# Supplementary material
Source: PubMed Central journal article supplement (PMC4097590)
Supplement: JB.01652-14_zjb999093223so1.pdf [file JB.01652-14_zjb999093223so1.pdf]

1

2

## Supplemental materials

3

**The terminal oxidase *cbb*<sub>3</sub> functions in redox control of magnetite biomineralization in**

4

***Magnetospirillum gryphiswaldense***

5

**Running title: Oxygen respiration and magnetite biomineralization**

6

7

Yingjie Li<sup>a</sup>, Oliver Raschdorf<sup>a,b</sup>, Karen T. Silva<sup>a</sup>, and Dirk Schüler<sup>a#</sup>

8

<sup>a</sup>Ludwig-Maximilians-Universität München, Department Biologie I, Mikrobiologie,

9

Großhaderner Str. 2-4, 82152 Planegg-Martinsried, Germany;

10

<sup>b</sup>Max Planck Institute of Biochemistry, Department of Molecular Structural Biology,

11

Am Klopferspitz 18, 82152 Martinsried, Germany

12

13

**#To whom correspondence should be addressed.**

14

**Dirk Schüler**, Biozentrum der LMU, Großhaderner Str.2-4, 82152 Planegg-Martinsried, Tel.:

15

004989218074502; Fax: 004989218074515; E-mail: [dirk.schueler@lrz.uni-muenchen.de](mailto:dirk.schueler@lrz.uni-muenchen.de).

16 Fig. S1 Biom mineralization phenotypes of  $\Delta cbb_3$  and  $\Delta aa_3\Delta cbb_3$  mutants incubated for 24 h (A  
17 and C) and 35 h (B and C) in microaerobic nitrate medium. Scale bar, 500 nm.

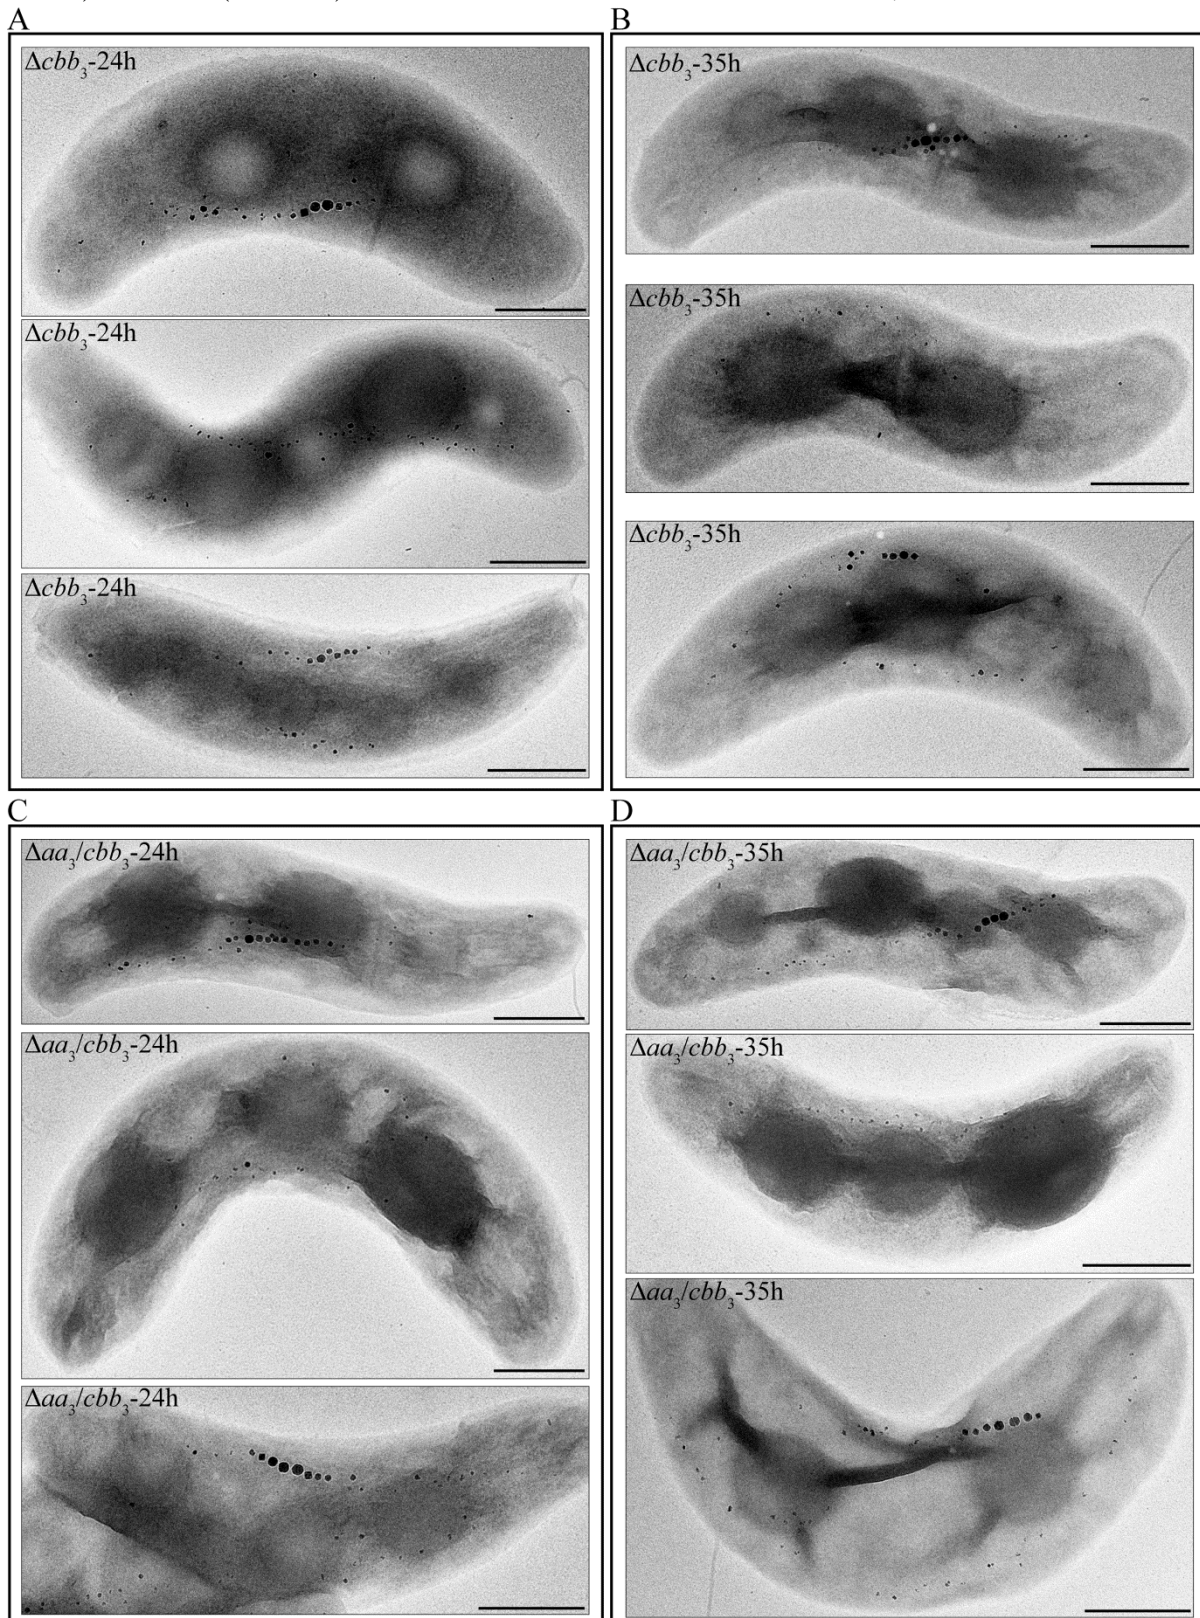

18

Table S1 Bacterial strains and plasmids used in this work

| Strain or plasmid                                                | Description                                                                                                                                                                                 | Reference                                 |
|------------------------------------------------------------------|---------------------------------------------------------------------------------------------------------------------------------------------------------------------------------------------|-------------------------------------------|
| Strains                                                          |                                                                                                                                                                                             |                                           |
| <i>E. coli</i> DH5 $\alpha$                                      | F' $\Phi$ 80d <i>lacZ</i> $\Delta$ M15 $\Delta$ ( <i>lacZYA-argF</i> )U169 <i>deoR recA1 endA1 hsdR17</i> ( $r_k^-$ , $m_k^+$ ) <i>phoA supE44 <math>\lambda</math>- thi-1 gyrA96 relA1</i> | Invitrogen                                |
| <i>E. coli</i> BW29427                                           | <i>dap</i> auxotroph derivative of <i>E. coli</i> strain B2155                                                                                                                              | K. Datsenko and B. L. Wanner, unpublished |
| MSR-1 WT                                                         | Wild type R3/S1, but Rif <sup>r</sup> , Sm <sup>r</sup>                                                                                                                                     | (1)                                       |
| $\Delta$ <i>Mgfnr</i>                                            | R3/S1, $\Delta$ <i>Mgfnr</i>                                                                                                                                                                | (Y. Li et al., submitted)                 |
| $\Delta$ <i>aa</i> <sub>3</sub>                                  | R3/S1, $\Delta$ <i>aa</i> <sub>3</sub>                                                                                                                                                      | This study                                |
| $\Delta$ <i>bd</i>                                               | R3/S1, $\Delta$ <i>bd</i>                                                                                                                                                                   | This study                                |
| $\Delta$ <i>cbb</i> <sub>3</sub>                                 | R3/S1, $\Delta$ <i>cbb</i> <sub>3</sub>                                                                                                                                                     | This study                                |
| $\Delta$ <i>bd</i> $\Delta$ <i>aa</i> <sub>3</sub>               | R3/S1, $\Delta$ <i>bd</i> $\Delta$ <i>aa</i> <sub>3</sub>                                                                                                                                   | This study                                |
| $\Delta$ <i>aa</i> <sub>3</sub> $\Delta$ <i>cbb</i> <sub>3</sub> | R3/S1, $\Delta$ <i>aa</i> <sub>3</sub> $\Delta$ <i>cbb</i> <sub>3</sub>                                                                                                                     | This study                                |
| $\Delta$ <i>bd</i> $\Delta$ <i>cbb</i> <sub>3</sub>              | R3/S1, $\Delta$ <i>bd</i> $\Delta$ <i>cbb</i> <sub>3</sub>                                                                                                                                  | This study                                |
| Plasmids                                                         |                                                                                                                                                                                             |                                           |
| pBBR1MCS-2                                                       | Km <sup>r</sup> , mobilizable broad-host-range vector                                                                                                                                       | (2)                                       |
| pOR093                                                           | <i>mamX</i> CXXCH (65,104)->AXXAH, pK19mobGII derivative, Km <sup>r</sup>                                                                                                                   | (3)                                       |
| pLYJ97                                                           | pBBR1MCS-2 plus <i>gusA</i> from pK19mobGII                                                                                                                                                 | (4)                                       |
| pLYJ115                                                          | pLYJ97 plus <i>cbb</i> <sub>3</sub> promoter region                                                                                                                                         | This study                                |
| pLYJ128                                                          | pOR093 plus 2-kb fused flanking section of <i>ccoNOQP</i>                                                                                                                                   | This study                                |
| pLYJ129                                                          | pOR093 plus 2-kb fused flanking section of <i>coxBAC</i>                                                                                                                                    | This study                                |
| pLYJ130                                                          | pOR093 plus 2-kb fused flanking section of <i>cydAB</i>                                                                                                                                     | This study                                |
| pLYJ135                                                          | pLYJ97 plus <i>aa</i> <sub>3</sub> promoter region                                                                                                                                          | This study                                |
| pLYJ137                                                          | pLYJ97 plus <i>bd</i> promoter region                                                                                                                                                       | This study                                |
| pLYJ138                                                          | pBBR1MCS-2 plus <i>cbb</i> <sub>3</sub> with its own promoter                                                                                                                               | This study                                |
| pLYJ139                                                          | pBBR1MCS-2 plus <i>aa</i> <sub>3</sub> with its own promoter                                                                                                                                | This study                                |
| pLYJ140                                                          | pBBR1MCS-2 plus <i>bd</i> with its own promoter                                                                                                                                             | This study                                |

20 Table S2 BlastP analyses of operons encoding terminal oxidases in MTB and non-MTB using MSR-1 as a query.

| Protein in MSR-1 | Encoded gene product (aa, kDa, pI) | AMB-1 (e-value, similarity) | MS-1 (e-value, similarity)   | MC-1 (e-value, similarity) | RS-1 (e-value, similarity)                        | Best hit in non-MTB (e-value, similarity)        |
|------------------|------------------------------------|-----------------------------|------------------------------|----------------------------|---------------------------------------------------|--------------------------------------------------|
| mgr_2544         | CcoN (532, 60.6, 9.09)             | -                           | WP_009870373.1 (0.0, 93%)    | Mmc1_2353 (0.0, 80%)       | -                                                 | <i>Novispirillum itersonii</i> (0.0, 87%)        |
| mgr_2545         | CcoO (243, 27.0, 6.30)             | Amb4363 (4e-137, 86%)       | WP_009870372.1 (7e-137, 86%) | Mmc1_2354 (1e-94, 70%)     | -                                                 | <i>Novispirillum itersonii</i> (2e-124, 82%)     |
| mgr_2546         | CcoQ (36, 4.4, 5.09)               | Amb4364 (3e-09, 91%)        | -                            | -                          | -                                                 | <i>Rhodospirillum rubrum</i> F11 (2e-11, 88%)    |
| mgr_2547         | CcoP (291, 31.2, 5.90)             | Amb4365 (8e-133, 76%)       | WP_009870371.1 (1e-134, 77%) | Mmc1_2355 (4e-52, 49%)     | -                                                 | <i>Phaeospirillum molischianum</i> (5e-123, 73%) |
| Mgr_0911         | CoxB (269, 30.1, 6.29)             | Amb2170 (1e-108, 76%)       | WP_009868696.1 (3e-113, 77%) | -                          | -                                                 | <i>Novispirillum itersonii</i> (6e-105, 77%)     |
| Mgr_0912         | CoxA (526, 57.4, 7.96)             | Amb2169 (0.0, 89%)          | WP_009868695.1 (0.0, 89%)    | -                          | -                                                 | <i>Novispirillum itersonii</i> (0.0, 88%)        |
| Mgr_0914         | CoxC (264, 29.5, 6.97)             | Amb2168 (2e-115, 79%)       | WP_009868693.1 (8e-104, 78%) | -                          | -                                                 | <i>Caenispirillum salinarum</i> (7e-105, 72%)    |
| Mgr_0697         | CydB (382, 41.3, 6.06)             | -                           | -                            | -                          | DMR_06970 (1e-63, 54%)<br>DMR_28310 (3e-23, 43%)  | <i>Novispirillum itersonii</i> (0.0, 87%)        |
| Mgr_0698         | CydA (518, 57.6, 8.66)             | -                           | -                            | -                          | DMR_06960 (2e-61, 46%)<br>DMR_28300 (4e-108, 55%) | <i>Novispirillum itersonii</i> (0.0, 92%)        |

21 AMB-1: *Magnetospirillum magneticum*; MS-1: *Magnetospirillum magnetotacticum*; MC-1: *Magnetococcus marinus*; RS-1: *Desulfobivrio magneticus*. The *ccoN*  
22 gene encoding the catalytic subunit of *cbb*<sub>3</sub> oxidase is not found in *M. magneticum* while the *ccoQ* gene encoding a small membrane protein of unknown function  
23 is missing in *Mc. marinus* and the incomplete genome assembly of *M. magnetotacticum*. *Mc. marinus* strain RS-1 harbors two *cydAB* operons as well as another  
24 operon *cyoABCDE* encoding a quinol oxidase *bo*<sub>3</sub> oxidase (*DMR\_14870*, *\_14880*, *\_14890*, *\_14900*, and *\_14910*).

25 Table S3 Growth (OD<sub>565 nm</sub>), magnetic response (C<sub>mag</sub>), and magnetosome crystal size of various  
 26 terminal oxidase mutants under different conditions.

| Strain                                               | OD <sub>565 nm</sub> | C <sub>mag</sub> | Crystal size (nm) | <i>n</i> |
|------------------------------------------------------|----------------------|------------------|-------------------|----------|
| <b>0% O<sub>2</sub></b>                              |                      |                  |                   |          |
| WT                                                   | 0.13 ±0.00           | 1.6 ±0.1         | 38.0 ±15.8        | 335      |
| Δ <i>aa</i> <sub>3</sub>                             | 0.13 ±0.00           | 1.7 ±0.0         | 38.4 ±14.9        | 335      |
| Δ <i>bd</i>                                          | 0.13 ±0.00           | 1.6 ±0.1         | 34.0 ±18.2        | 427      |
| Δ <i>bd</i> Δ <i>aa</i> <sub>3</sub>                 | 0.14 ±0.02           | 1.7 ±0.1         | 35.9 ±24.3        | 304      |
| Δ <i>cbb</i> <sub>3</sub>                            | 0.14 ±0.01           | 1.7 ±0.2         | 35.2 ±23.4        | 300      |
| Δ <i>aa</i> <sub>3</sub> Δ <i>cbb</i> <sub>3</sub>   | 0.13 ±0.00           | 1.7 ±0.1         | 34.6 ±16.6        | 470      |
| Δ <i>bd</i> Δ <i>cbb</i> <sub>3</sub>                | 0.14 ±0.01           | 1.6 ±0.0         | 38.4 ±19.9        | 318      |
| <b>2% O<sub>2</sub>, +NO<sub>3</sub><sup>-</sup></b> |                      |                  |                   |          |
| WT                                                   | 0.22 ±0.01           | 1.6 ±0.0         | 28.0 ±15.3        | 337      |
| Δ <i>aa</i> <sub>3</sub>                             | 0.22 ±0.01           | 1.6 ±0.0         | 30.1 ±15.0        | 334      |
| Δ <i>bd</i>                                          | 0.20 ±0.01           | 1.7 ±0.0         | 30.1 ±14.6        | 309      |
| Δ <i>bd</i> Δ <i>aa</i> <sub>3</sub>                 | 0.22 ±0.01           | 1.7 ±0.1         | 31.1 ±13.0        | 319      |
| <b>2% O<sub>2</sub>, +NH<sub>4</sub><sup>+</sup></b> |                      |                  |                   |          |
| WT                                                   | 0.11 ±0.00           | 1.5 ±0.1         | -                 | -        |
| Δ <i>aa</i> <sub>3</sub>                             | 0.12 ±0.01           | 1.5 ±0.0         | -                 | -        |
| Δ <i>bd</i>                                          | 0.10 ±0.01           | 1.4 ±0.1         | -                 | -        |
| Δ <i>bd</i> Δ <i>aa</i> <sub>3</sub>                 | 0.11 ±0.00           | 1.4 ±0.1         | -                 | -        |

27 Number of crystals measured for each strain (*n*) is presented in the last column.

## 28 References

- 29 1. **Schultheiss D, Kube M, Schüler D.** 2004. Inactivation of the flagellin gene *flaA* in  
 30 *Magnetospirillum gryphiswaldense* results in nonmagnetotactic mutants lacking flagellar  
 31 filaments. Appl. Environ. Microbiol. **70**:3624-3631.
- 32 2. **Kovach ME, Elzer PH, Hill DS, Robertson GT, Farris MA, Roop RM, Peterson KM.**  
 33 1995. Four new derivatives of the broad-host-range cloning vector pBBR1MCS, carrying  
 34 different antibiotic-resistance cassettes. Gene **166**:175-176.
- 35 3. **Raschdorf O, Müller FD, Posfai M, Plitzko JM, Schüler D.** 2013. The magnetosome  
 36 proteins MamX, MamZ and MamH are involved in redox control of magnetite  
 37 biomineralization in *Magnetospirillum gryphiswaldense*. Mol. Microbiol. **89**:872-886.
- 38 4. **Li Y, Katzmann E, Borg S, Schüler D.** 2012. The periplasmic nitrate reductase Nap is  
 39 required for anaerobic growth and involved in redox control of magnetite  
 40 biomineralization in *Magnetospirillum gryphiswaldense*. J. Bacteriol. **194**:4847-4856.

41
